# Supplementary material for: Comparison of follicle formation and molecular characteristics in reconstituted ovarioids under limited somatic cell conditions
Source: Research Square preprint supplement (doi:10.21203/rs.3.rs-8588693/v1), 2026-01-21

**Supplementary Information (SI)**

**Comparison of follicle formation and molecular characteristics in reconstituted ovarioids under limited somatic cell conditions**

**Cytotechnology**

Seung-Eun Lee1, Safeer Ullah1, Zhaojun Geng1, Muhammad Tayyab Khan1, Myeong-Don Joo1, 5, Yong-Xun Jin3, Mingjun Zhang3, Xian-Feng Yu3, Song Park1,2, Muhammad Idrees1,2†, Il-Keun Kong1,2,4†

1 Division of Applied Life Science (BK21 Four), Graduate School of Applied Life Science, Gyeongsang National University, Jinju 52828, Gyeongnam Province, Republic of Korea

2 Institute of Agriculture and Life Science, Gyeongsang National University, Jinju 52828, Gyeongnam Province, Republic of Korea

3Jilin Provincial Key Laboratory of Animal Model, College of Animal Science, Jilin University, Changchun 130062, China

4 The King Kong Corp. Ltd., Gyeongsang National University, Jinju 52828, Gyeongnam Province, Republic of Korea

5 Present Address: Department of Animal, Dairy and Veterinary Sciences at Utah State University, College of Agriculture and Applied Sciences, Utah State University, Logan, UT, USA.

†Corresponding author: Il-Keun Kong (Tel) +82-55-772-1942, (E-mail) [ikong7900@gmail.com](mailto:ikong7900@gmail.com)

†Co-corresponding Author: Muhammad Idrees (Tel) +82-10-4111-3445, (E-mail) [idrees1600@gmail.com](mailto:idrees1600@gmail.com)

**Online Resource 1.** List of RT-qPCR primers used in this study

| Genes | Primer Sequences | Accession number |
| --- | --- | --- |
| *Gapdh* | CCAGTATGACTCCACTCACG | GU214026.1 |
| ACACCAGTAGACTCCACGAC |
| *Figla* | GTTTCTACCACAGAGCAGGA | JN700518.1 |
| GCTCTCTAGTCGAGGACACA |
| *Nobox* | CCTGGATGTCTTTCCTGAGC | BC125282.1 |
| GTCCCTCATTGGAGGCAGTA |
| *Lhx8* | GAAGAACAGTGGGTCAGAGA | NM_001410062.1 |
| CCTCCAGCTTACACACAAAC |
| *Gdf9* | AGAGCACCGTACTCATTCAC | NM_008110.3 |
| AGAGACTGCCAAGAGTGGTA |
| *Bmp15* | CTAGCATCAAACCAGGTAGC | NM_009757.5 |
| CCAGAGCTTCTGCTGAATAC |
| *Foxo3* | GTCCATCATCCGTAGTGAAC | NM_001376967.1 |
| CTCTGTAGGTCTTCCGTCAG |
| *Foxl2* | TAGCCAAGTTCCCGTTCTAC | NM_012020.3 |
| CCTTCTCGAACATGTCCTC |
| *Wnt4* | GTATACGCCATCTCTTCAGC | BC101962.1 |
| GTCCACAAAGGACTGTGAGA |
| *Kit* | AGTGTGTACGTGGTCATGTG | NM_001122733.1 |
| GGAAAGGTGCAAGAGTGTAG |
| *Kitl* | TCCACCACCTCTAACCATAG | NM_013598.4 |
| AGAACAAACTCCTGGCTACC |
| *Akt1* | GGCAGGATGTGTATGAGAAG | NM_001409449.1 |
| CACTGGCTGAGTAGGAGAAC |
| *Bax* | CTGCAGAGGATGATTGCTGA | NM_007527.4 |
| GATCAGCTCGGGCACTTTAG |
| *Bcl2* | GGGAAGCAGGGTTTAGGAAG | NM_177410.3 |
| ACCCATCACCTTCAAAGCAC |
| *Brca1* | AGAAGGGAGTCCAGTAGGAG | U68174.1 |
| TCTCTGGAATACCCTGTGTC |
| *Chek2* | AGAACCTGAAGAACCTGGTC | NM_016681.4 |
| GTACTTGTCCGTCCTTCTCA |
| *Tap63* | CCAGCACCTACTTCAGAAAC | BC090649.1 |
| GAGTCCATTCATGTCTCCAG |
| *Perp* | AGTGTTCTAACGTGGCTGAG | BC021772.1 |
| TACCTGACCTCTTCACATCC |
| *Tfam* | AAGGGAATGGGAAAGGTAGA | NM-011045 |
| AACAGGACATGGAAAGCAGAT |
| *Afadin* | GACTGGCTGCTGAAGTTTAC | NM_010806.1 |
| GTCTGCGGTATCGGTAGTAG |
| *Cx43* | GGAAAGGGGAGGTATGTAAC | BC055375.1 |
| GCTCTATGGCAGAATCTCAG |
| *Cx37* | CTTTGTGATGACCAGAGGAC | BC056613.1 |
| GGGTTCAGTGACTCGTCTAA |
| *Nr2f2* | GTGGTCTGTCTGATGTAGCC | BC042484.1 |
| TGCTCTATGACTGAGGAGGA |

**Online Resource 2**. List of antibodies used in this study

| Target | Antigens | Host | Dilutions | Catalog # |
| --- | --- | --- | --- | --- |
| GSCs | NR5A1 | Mouse | 1:250 | sc-393592 |
| PGCs | DDX4 | Rabbit | 1:250 | ab13840 |
| Autophagy and Apoptosis markers | BECN1 | Mouse | 1:250 | sc-48341 |
| CASPASE-3 | Goat | 1:250 | sc-1225 |
| Stromal cell markers | LAMININ | Rabbit | 1:250 | GR-346862-1 |
| β-CATENIN | Rabbit | 1:250 | GR-184212-67 |
| Junction markers | N-CADHERIN | Mouse | 1:250 | sc-8424 |
| CD44 | Rabbit | 1:250 | ab157107 |

**Online Resource 3**. Identification of various PGC and GSC ratios for r-ovarioids aggregate formation.


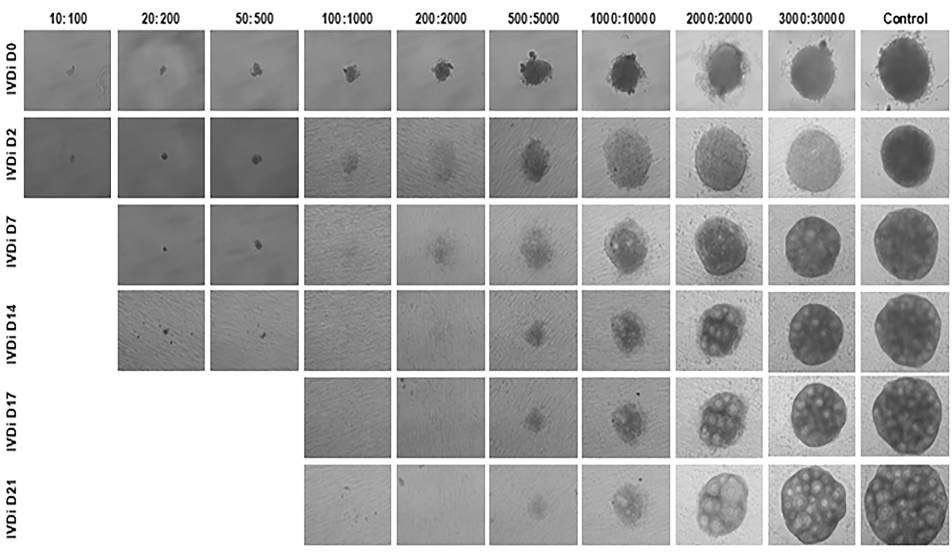

Supplement: Supplementary file 1 [file bcf9bb6a2337af224bda7cc0.docx]
